# Supplementary material for: OMKar automates genome karyotyping using optical maps to identify constitutional abnormalities
Source: medRxiv preprint, doi:10.1101/2025.02.13.25322211, version 2 (2025-10-27)
Supplement: Supplementary tables [file 322211_file02.xlsx]

## Sheet: S1
Simulated terminal .SV edge recall by event types. Recall of SVs with breakpoint in the peri-terminal region. Different matching allowance was used in the KarCheck module to observe the reconstruction breakpoint distance from the truth SV breakpoint.
Simulated Terminal SV Edge Type	Simulated/Identified (matching up to 0.2 Mbp)	Simulated/Identified (matching up to 1 Mbp)	Simulated/Identified (matching up to 5 Mbp)
Deletion	11/3 (27.3%)	11/9 (81.8%)	11/9 (81.8%)
Arm Deletion	14/0 (0.0%)	14/3 (21.4%)	14/11 (78.6%)
Inversion	28/12 (42.9%)	28/12 (42.9%)	28/12 (42.9%)
Duplication Inversion	52/29 (55.8%)	52/34 (65.4%)	52/36 (69.2%)
Tandem Duplication	12/6 (50.0%)	12/9 (75.0%)	12/10 (83.3%)
Total	117/50 (42.7%)	117/67 (57.3%)	117/78 (66.7%)

## Sheet: S2
Clinical sample information. Includes information on each clinical sample. Sample ID: consistent ID as addressed in the paper, and it also distinguishes sample cohort; Test Site: location the sample was sequenced; Replicate Info: biological replicates of the sample, if applicable; Clinical Phenotype/Risk: clinical documentation of the reason this individual was tested; SOC G2P Prediction: clinica…
Sample ID	Test Site	Replicate Info	Clinical Phenotype/Risk	SOC G2P Prediction	OMKar G2P Prediction	Karyotyping Performed	CMA Performed	FISH Performed
Prenatal 13	URMC	N/a	Possible Skeletal Dysplasia; fetal demise	None	None	FALSE	TRUE	FALSE
Prenatal 54	CCHMC	N/a	Family History	None	None	TRUE	FALSE	FALSE
Prenatal 57	CCHMC	N/a	CfDNA positive for XXY	XXY	XXY	TRUE	FALSE	FALSE
Prenatal 62	CCHMC	N/a	+NIPT	XXY	XXY	TRUE	FALSE	FALSE
Prenatal 130	CCHMC	N/a	Positive NIPT	Edwards syndrome	Edwards syndrome	TRUE	FALSE	TRUE
Prenatal 139	URMC	N/a	Multiple Anomalies on u/s	Patau Syndrom	Patau Syndrom	TRUE	FALSE	TRUE
Prenatal 145	URMC	N/a	bilateral plueral effusions on us	None	None	FALSE	TRUE	TRUE
Prenatal 147	URMC	N/a	NIPT inc risk trisomy 18	None	None	FALSE	TRUE	TRUE
Prenatal 151	URMC	N/a	NIPS pos for "partial/complete" monosomy 13, SABx3	None	None	FALSE	TRUE	FALSE
Prenatal 184	URMC	N/a	Abnormal fetal ultrasound: absent nasal bone, vanished twin	Down Syndrom	Down Syndrom	TRUE	TRUE	FALSE
Prenatal 186	URMC	N/a	Abnormal Fetal Ultrasound: Fetal multicystic dysplastic left kidney, two vessel cord	None	None	FALSE	TRUE	FALSE
Prenatal 205	CCHMC	N/a	Abnormal US	None	None	TRUE	TRUE	TRUE
Prenatal 219	CCHMC	N/a	Advanced maternal age	Down Syndrom	Down Syndrom	TRUE	FALSE	TRUE
Prenatal 221	CCHMC	N/a	Advanced maternal age	Down Syndrom	Down Syndrom	TRUE	FALSE	TRUE
Prenatal 226	URMC	N/a	Increased risk of DiGeorge Syndrome	None	None	FALSE	TRUE	FALSE
Prenatal 228	URMC	N/a	Abnormality on US: Dandy Walker malformation	None	None	FALSE	TRUE	FALSE
Prenatal 230	URMC	N/a	Abnormality on US: Ambiguous genitalia	Turner Syndrom	Turner Syndrom	TRUE	TRUE	FALSE
Prenatal 232	URMC	N/a	Down syndrome on Panorama NIPT, Abnormal fetal ultrasound: Bilateral ventriculomegaly, Dandy Walker malformation	Down Syndrom	Down Syndrom	FALSE	TRUE	FALSE
Prenatal 234	URMC	N/a	Abnormal fetal ultrasound: thick nuchal translucency on prior ultrasound; Family history: father of baby with niece with microdeletion from chromosome 18 and trisomy chromosome 9	None	None	FALSE	TRUE	FALSE
Prenatal 244	CCHMC	N/a	Abnormal US	Patau Syndrom	Patau Syndrom	TRUE	FALSE	FALSE
Prenatal 282	BWH	N/a	Severe tricuspid regurgitation	None	None	FALSE	TRUE	FALSE
Prenatal 463	URMC	N/a	Abnormal fetal ultrasound: Abnormal brain, echogenic intracardiac focus, small kidneys; Family history: Patient and partner are cystic fibrosis carriers	None	None	FALSE	TRUE	FALSE
Prenatal 492	Augusta	N/a	Advanced Maternal Age, Fetal hydrops	None	None	FALSE	TRUE	FALSE
Prenatal 493	Augusta	N/a	Elivated Nuchal/twin demise	None	None	FALSE	TRUE	FALSE
Prenatal 494	Augusta	N/a	Fetal Heart Defect. Suspect down syndrome, 22q11.2 del, or ,maternal meds	None	None	FALSE	TRUE	FALSE
Prenatal 495	Augusta	N/a	Choroid plexus cyst	None	None	FALSE	FALSE	FALSE
Prenatal 505	Augusta	N/a	Intrauterine Growth Retardation	None	None	TRUE	FALSE	FALSE
Prenatal 511	Augusta	N/a	Heart Defect and mutlicystic kidneys	None	None	FALSE	TRUE	FALSE
Prenatal 512	Augusta	N/a	Cystic Hygroma on u/s	None	None	FALSE	TRUE	FALSE
Prenatal 514	Augusta	N/a	Congenital heart defect	None	None	FALSE	TRUE	FALSE
Prenatal 515	Augusta	N/a	Multiple Anomalies on u/s	Patau Syndrom	Patau Syndrom	TRUE	TRUE	FALSE
Prenatal 516	Augusta	N/a	Fetal abdominal situs inversus	None	None	FALSE	TRUE	FALSE
Prenatal 517	Augusta	N/a	Possible Skeletal Dysplasia; fetal demise	None	None	FALSE	TRUE	FALSE
Prenatal 518	Augusta	N/a	pleural effusions, ascites, edema	Down Syndrom	Down Syndrom	FALSE	TRUE	FALSE
Prenatal 519	Augusta	N/a	ICEF, AMA, child with seizures, club foot, delay	None	None	FALSE	TRUE	FALSE
Prenatal 521	Augusta	N/a	decreased chromosome 1p36 on Maternti21, suspected fetal anomaly	None	None	FALSE	TRUE	FALSE
Prenatal 522	Augusta	N/a	unilateral agenesis, clubfoot	None	None	FALSE	TRUE	FALSE
Prenatal 523	Augusta	N/a	AMA, sonographic anomalies, renal pyelectasis, left dissected aortic arch	None	None	FALSE	TRUE	FALSE
Prenatal 524	Augusta	N/a	single umbilical artery, ambiguous genitalia	None	None	FALSE	TRUE	FALSE
Prenatal 525	Augusta	N/a	heart defect	None	None	FALSE	TRUE	FALSE
Prenatal 527	Augusta	N/a	NIPT inc risk trisomy 18	None	None	FALSE	TRUE	FALSE
Prenatal 529	Augusta	N/a	daughter with abn array, pt has deletion,	None	None	FALSE	TRUE	FALSE
Prenatal 530	Augusta	N/a	bilateral radial limb anomaly, VSD	None	None	FALSE	TRUE	FALSE
Prenatal 531	Augusta	N/a	NIPS pos for "partial/complete" monosomy 13, SABx3	None	None	FALSE	TRUE	FALSE
Prenatal 532	Augusta	N/a	cardiac defect	None	None	FALSE	TRUE	FALSE
Prenatal 548	Augusta	N/a	abnormal NIPT for X chromosome and no evidence ofY	Turner Syndrom	Turner Syndrom	FALSE	TRUE	FALSE
Prenatal 549	Augusta	N/a	abn u/s, short femur, short humerus	None	None	FALSE	TRUE	FALSE
Prenatal 550	Augusta	N/a	bilateral plueral effusions on us	None	None	FALSE	TRUE	FALSE
Prenatal 731	Bionano Labs	N/a	unilateral agenesis, clubfoot	None	None	FALSE	TRUE	FALSE
Prenatal 739	Bionano Labs	N/a	unilateral agenesis, clubfoot	None	None	FALSE	TRUE	FALSE
Postnatal 512	Praxis	['Postnatal 512', 'Postnatal 544', 'Postnatal 1878', 'Postnatal 919', 'Postnatal 2209', 'Postnatal 2436']	Short stature; atrial septal defect; unspecified disorder of muscle; and unspecified lack of expected normal physiological development in childhood	Triple X	Triple X	TRUE	TRUE	FALSE
Postnatal 544	Iowa	['Postnatal 512', 'Postnatal 544', 'Postnatal 1878', 'Postnatal 919', 'Postnatal 2209', 'Postnatal 2436']	None	Triple X	Triple X	TRUE	TRUE	FALSE
Postnatal 798	MCW	N/a	Asymptomatic	None	None	FALSE	TRUE	FALSE
Postnatal 889	Iowa	N/a	Clinically affected with prominent micrognathia, small ears (left ear measuring 45 mm and right ear measuring 47 mm); adult with small stature (height = 61 inches and weight = 117 pounds); head circumference = 57.5 cm; and 2 of 3 children also affected	None	None	TRUE	TRUE	TRUE
Postnatal 919	URMC	['Postnatal 512', 'Postnatal 544', 'Postnatal 1878', 'Postnatal 919', 'Postnatal 2209', 'Postnatal 2436']	None	Triple X	Triple X	TRUE	TRUE	FALSE
Postnatal 1251	Augusta	['Postnatal 1251', 'Postnatal 1404']	Multiple spitz nevi originally read as melanoma, reduced DNA repair, severe sensorineural deafness, tans easily, no freckling.	None	None	TRUE	TRUE	TRUE
Postnatal 1293	Praxis	N/a	Unspecified lack of expected normal physiological development in childhood, attention-deficit hyperactivity disorder- combined type, other symptoms & signs involving gastrointestinal sensations & perceptions, irritability and anger, mixed receptive-expressive language disorder.	XYY	XYY	FALSE	TRUE	FALSE
Postnatal 1294	Praxis	N/a	Healthy, parent of child born with multiple congenital anomalies	None	None	TRUE	FALSE	FALSE
Parental 1298	Praxis	N/a	Three miscarriages	Inheritance Issue from Balanced Translocation	Inheritance Issue from Balanced Translocation	TRUE	FALSE	FALSE
Postnatal 1301	Praxis	N/a	Family history of cri-du-chat, Asymptomatic	None	None	TRUE	FALSE	FALSE
Parental 1350	Praxis	N/a	Infertility and miscarriage	Inheritance Issue from Balanced Translocation	Inheritance Issue from Balanced Translocation	TRUE	FALSE	FALSE
Parental 1359	Praxis	N/a	Parent of child with 12p13.3 duplication identified by karyotype, and reported balanced translocation carrier	Inheritance Issue from Balanced Translocation	Inheritance Issue from Balanced Translocation	TRUE	FALSE	FALSE
Parental 1392	Praxis	N/a	Previous amniocentesis with abnormal CMA finding	Inheritance Issue from Balanced Translocation	Inheritance Issue from Balanced Translocation	TRUE	FALSE	FALSE
Postnatal 1397	Praxis	N/a	Delayed milestones in childhood, dysmorphic features, poor muscle tone, and growth delay. Family history: positive for anxiety disorder, depressive disorder, and social delays.	None	None	FALSE	TRUE	FALSE
Postnatal 1404	Praxis	['Postnatal 1251', 'Postnatal 1404']	None	None	None	TRUE	TRUE	TRUE
Postnatal 1528	Augusta	N/a	Clinical features of Down syndrome	Down Syndrom	Down Syndrom	TRUE	FALSE	FALSE
Postnatal 1544	Augusta	N/a	Autism spectrum disorder	None	None	TRUE	TRUE	TRUE
Postnatal 1562	Augusta	N/a	Speech delay	None	None	TRUE	TRUE	FALSE
Postnatal 1670	Praxis	N/a	Asymptomatic	None	None	TRUE	TRUE	FALSE
Parental 1714	Praxis	N/a	First miscarriage had an unbalanced translocation	Inheritance Issue from Balanced Translocation	Inheritance Issue from Balanced Translocation	TRUE	FALSE	FALSE
Postnatal 1878	Augusta	['Postnatal 512', 'Postnatal 544', 'Postnatal 1878', 'Postnatal 919', 'Postnatal 2209', 'Postnatal 2436']	None	Triple X	Triple X	TRUE	TRUE	FALSE
Parental 1999	Praxis	N/a	Child with Wolf-Hirschhorn syndrome due to unbalanced translocation, and history of five previous pregnancy losses. Was found to have a variant in MTHFR.	Parental Balanced Translocation leads to Wolf-Hirschhorn unbalanced translocation in Child	Parental Balanced Translocation leads to Wolf-Hirschhorn unbalanced translocation in Child	FALSE	FALSE	TRUE
Postnatal 2003	Praxis	N/a	Family history of balanced autosomal translocation, Asymptomatic	None	None	TRUE	FALSE	FALSE
Parental 2006	Praxis	N/a	Recurrent pregnancy loss	Inheritance Issue from Balanced Translocation	Inheritance Issue from Balanced Translocation	TRUE	FALSE	FALSE
Postnatal 2073	Augusta	N/a	Global developmental delay and hypotonia. Born at 37 weeks via C-section, low transverse position with vacuum assistance and received oxygen for a brief time. Weighed 6lb 14.1oz. Strabismus surgery performed.	XYY	XYY	FALSE	TRUE	FALSE
Postnatal 2079	Augusta	N/a	Short stature, low posterior hairline, prominent auricles, primary ovarian failure	Turner Syndrom	Turner Syndrom	FALSE	TRUE	FALSE
Postnatal 2081	MCW	N/a		None	None	TRUE	FALSE	FALSE
Postnatal 2083	MCW	N/a	Intellectual disability and skeletal disorder	None	None	TRUE	FALSE	FALSE
Postnatal 2085	MCW	N/a	Developmental delay, dysmorphic features, balanced translocation	None	None	TRUE	FALSE	FALSE
Postnatal 2147	MCW	['Postnatal 2147', 'Postnatal 2449']	Asymptomatic	None	None	FALSE	TRUE	FALSE
Postnatal 2157	MCW	N/a	Asymptomatic	None	None	TRUE	FALSE	FALSE
Postnatal 2209	MCW	['Postnatal 512', 'Postnatal 544', 'Postnatal 1878', 'Postnatal 919', 'Postnatal 2209', 'Postnatal 2436']	None	Triple X	Triple X	TRUE	TRUE	FALSE
Postnatal 2238	Augusta	N/a	Syndactyly, ptyergia, synostosis, and skeletal disorder	None	None	TRUE	TRUE	FALSE
Postnatal 2243	Augusta	N/a	Intellectual disability	None	None	TRUE	FALSE	FALSE
Postnatal 2245	Augusta	N/a	Intellectual disability	None	None	TRUE	FALSE	TRUE
Postnatal 2249	Augusta	N/a	Affected by Down syndrome, translocation	None	None	TRUE	TRUE	TRUE
Postnatal 2254	Augusta	N/a	Autistic features and cognitive delays	None	None	TRUE	FALSE	FALSE
Postnatal 2276	MCW	N/a	Intellectual disability and seizures	None	translocation interrupts TANC2: TANC2-related neurodevelopmental and psychiatric disorders	TRUE	FALSE	FALSE
Postnatal 2280	Augusta	N/a	Developmental delays, mild dysmorphic features, hypotonia	None	None	TRUE	FALSE	FALSE
Postnatal 2281	Augusta	N/a	Developmental delay	None	transposition interrupts MBD5: EHMT1-like ID	TRUE	TRUE	TRUE
Postnatal 2282	Augusta	N/a	Intellectual disability	None	translocation interrupts SOX5: 12P12.5 Intragenic deletions associated with ID	TRUE	FALSE	FALSE
Postnatal 2283	Augusta	N/a	ADHD and digit defect	None	None	TRUE	TRUE	FALSE
Postnatal 2284	Augusta	N/a	Intellectual disability	None	None	TRUE	FALSE	FALSE
Postnatal 2285	Augusta	N/a	Down syndrome phenotype	Down Syndrom	Down Syndrom	TRUE	TRUE	FALSE
Postnatal 2327	Augusta	N/a	Developmental delay	None	None	TRUE	TRUE	TRUE
Postnatal 2335	MCW	N/a	Intellectual disability	None	None	TRUE	FALSE	FALSE
Postnatal 2436	CUMC	['Postnatal 512', 'Postnatal 544', 'Postnatal 1878', 'Postnatal 919', 'Postnatal 2209', 'Postnatal 2436']	None	Triple X	Triple X	TRUE	TRUE	FALSE
Postnatal 2449	CUMC	['Postnatal 2147', 'Postnatal 2449']	Asymptomatic	None	None	FALSE	TRUE	FALSE
Parental 1	Vienna	N/a	Infertility	None	None	TRUE	TRUE	FALSE
Parental 2	Vienna	N/a	Infertility	None	None	TRUE	FALSE	FALSE
Parental 3	Vienna	N/a	Infertility	None	None	TRUE	TRUE	FALSE
Parental 4	Vienna	N/a	Infertility	None	None	TRUE	FALSE	FALSE
Parental 5	Vienna	N/a	Infertility	None	None	TRUE	FALSE	FALSE
Parental 6	Vienna	N/a	Infertility	None	None	TRUE	FALSE	FALSE
Parental 7	Vienna	N/a	Infertility	None	None	TRUE	TRUE	FALSE
Parental 8	Vienna	N/a	Infertility	None	None	TRUE	FALSE	FALSE
Parental 9	Vienna	N/a	Infertility	None	None	TRUE	FALSE	FALSE
Parental 10	Vienna	N/a	Infertility	None	None	TRUE	TRUE	FALSE
Parental 11	Vienna	N/a	Infertility	None	None	TRUE	FALSE	FALSE
Parental 12	Vienna	N/a	Infertility	None	None	TRUE	FALSE	FALSE
Parental 13	Vienna	N/a	Infertility	Inheritance Issue from Rob	None	TRUE	TRUE	FALSE
Parental 14	Vienna	N/a	Infertility	None	None	TRUE	FALSE	FALSE
Parental 15	Vienna	N/a	Infertility	None	None	TRUE	FALSE	FALSE
Parental 16	Vienna	N/a	Infertility	None	None	TRUE	FALSE	FALSE
Parental 17	Vienna	N/a	Infertility	None	None	TRUE	FALSE	FALSE
Parental 18	Vienna	N/a	Infertility	None	None	TRUE	TRUE	FALSE
Parental 19	Vienna	N/a	Infertility	monoallelic loss of DMD, leads to Becker muscular dystrophy	monoallelic loss of DMD, leads to Becker muscular dystrophy	TRUE	TRUE	FALSE
Parental 20	Vienna	N/a	Infertility	None	None	TRUE	FALSE	FALSE
Parental 21	Vienna	N/a	Infertility	None	None	TRUE	FALSE	FALSE
Parental 22	Vienna	N/a	Infertility	None	None	TRUE	FALSE	FALSE
Parental 23	Vienna	N/a	Infertility	None	None	TRUE	TRUE	FALSE
Parental 24	Vienna	N/a	Infertility	None	None	TRUE	FALSE	FALSE
Parental 25	Vienna	N/a	Infertility	None	None	TRUE	TRUE	FALSE
Parental 26	Vienna	N/a	Infertility	None	None	TRUE	FALSE	FALSE
Parental 27	Vienna	N/a	Infertility	None	None	TRUE	FALSE	FALSE
Parental 28	Vienna	N/a	Infertility	None	None	TRUE	FALSE	FALSE
Parental 29	Vienna	N/a	Infertility	None	None	TRUE	FALSE	FALSE
Parental 30	Vienna	N/a	Infertility	None	None	TRUE	FALSE	FALSE
Parental 31	Vienna	N/a	Infertility	None	None	TRUE	TRUE	FALSE
Parental 32	Vienna	N/a	Infertility	None	None	TRUE	FALSE	FALSE
Parental 33	Vienna	N/a	Infertility	None	None	TRUE	FALSE	FALSE
Parental 34	Vienna	N/a	Infertility	None	None	TRUE	FALSE	FALSE
Parental 35	Vienna	N/a	Infertility	None	None	TRUE	FALSE	FALSE
Parental 37	Vienna	N/a	Infertility	None	None	TRUE	FALSE	FALSE
Parental 38	Vienna	N/a	Infertility	None	None	TRUE	FALSE	FALSE
Parental 39	Vienna	N/a	Infertility	Inheritance Issue from Balanced Translocation	Inheritance Issue from Balanced Translocation	TRUE	TRUE	FALSE
Parental 40	Vienna	N/a	Infertility	None	None	TRUE	FALSE	FALSE
Parental 41	Vienna	N/a	Infertility	None	None	TRUE	FALSE	FALSE
Parental 42	Vienna	N/a	Infertility	None	None	TRUE	FALSE	FALSE
Parental 43	Vienna	N/a	Infertility	None	None	TRUE	FALSE	FALSE
Parental 44	Vienna	N/a	Infertility	None	None	TRUE	FALSE	FALSE
Parental 45	Vienna	N/a	Infertility	Inheritance Issue from Balanced Translocation	Inheritance Issue from Balanced Translocation	TRUE	FALSE	FALSE
Parental 46	Vienna	N/a	Infertility	None	None	TRUE	FALSE	FALSE
Parental 47	Vienna	N/a	Infertility	None	None	TRUE	FALSE	FALSE
Parental 48	Vienna	N/a	Infertility	None	None	TRUE	FALSE	FALSE
Parental 49	Vienna	N/a	Infertility	None	None	TRUE	FALSE	FALSE
Parental 50	Vienna	N/a	Infertility	None	None	TRUE	FALSE	FALSE
Parental 51	Vienna	N/a	Infertility	None	None	TRUE	FALSE	FALSE
Parental 52	Vienna	N/a	Infertility	None	None	TRUE	FALSE	FALSE
Parental 53	Vienna	N/a	Infertility	None	None	TRUE	FALSE	FALSE
Parental 54	Vienna	N/a	Infertility	None	None	TRUE	FALSE	FALSE
Parental 55	Vienna	N/a	Infertility	None	None	TRUE	FALSE	FALSE
Parental 56	Vienna	N/a	Infertility	None	None	TRUE	FALSE	FALSE
Parental 57	Vienna	N/a	Infertility	None	None	TRUE	FALSE	FALSE

## Sheet: S3
Clinical sample variant information. Includes information on each structural variation as identified by different techniques. The information includes the following. Cluster ID of the chromosome cluster for the SV; Cluster Chroms lists the chromosome groups within this chromosome cluster; Structural Variation: clinical annotation of this SV, written in ISCN annotation, based on SOC data only. Col…
Cluster ID	Cluster Chroms	SV Type	Structural Variation	Karyotype Result	CMA Result	FISH Result	OMKar Result	Karyotyping Concordance	CMA Concordance	FISH Concordance	OMKar Concordance	Edges Missed in OMKar Reconstruction	Reason for OMKar miss	G2P Prediction by OMKar	size
Parental 1 Cluster 1	['16']	dup	dup(16)(9736337;9773922)	missed	chr16:9736337-9773922 Dup	N/a	BED:dup(9730730-9776010)	FALSE	TRUE	N/a	TRUE	0	N/a	N/a	37585
Parental 3 Cluster 1	['2']	dup	dup(2)(124275338;125329706)	missed	chr2:124275338-125329706 Dup	N/a	dup(2)(124,272,274-125,309,790)	FALSE	TRUE	N/a	TRUE	0	N/a	N/a	1054368
Parental 7 Cluster 1	['1']	dup	dup(1)(108918097;109176044)	missed	chr1:108918097-109176044 Dup	N/a	dup(1)(108,914,292-109,194,783)	FALSE	TRUE	N/a	TRUE	0	N/a	N/a	257947
Parental 7 Cluster 2	['2']	dup	dup(2)(96336994;96369531)	missed	chr2:96336994-96369531 Dup	N/a	missed	FALSE	TRUE	N/a	FALSE	1	size below OMKar threshold	N/a	32537
Parental 10 Cluster 1	['10']	dup	dup(10)(34766430;34868921)	missed	chr10:34766430-34868921 Dup	N/a	BED:dup(34761790-34871492)	FALSE	TRUE	N/a	TRUE	0	N/a	N/a	102491
Parental 10 Cluster 2	['13']	del	del(13)(83924804;84470142)	missed	chr13:83924804-84470142 Del	N/a	del(13)(83,918,823-84,490,353)	FALSE	TRUE	N/a	TRUE	0	N/a	N/a	545338
Prenatal 62 Cluster 1	['X']	chr-dup	(X)x2,(Y)x1	47,XXY	N/a	N/a	(X)x2,(Y)x1	TRUE	N/a	N/a	TRUE	0	N/a	XXY
Parental 13 Cluster 2	['12']	dup	dup(12)(56001756;56005536)	missed	chr12:56001756-56005536 Dup	N/a	missed	FALSE	TRUE	N/a	FALSE	1	size below OMKar threshold	N/a	3780
Parental 18 Cluster 1	['4']	del	del(4)(91393879;91502670)	missed	chr4:91393879-91502670 Del	N/a	BED:del(4)(91376097-91525138)	FALSE	TRUE	N/a	TRUE	0	N/a	N/a	108791
Parental 18 Cluster 1	['4']	del	del(4)(178617093;178781930)	missed	chr4:178617093-178781930 Del	N/a	del(4)(178,581,822-178,795,017)	FALSE	TRUE	N/a	TRUE	0	N/a	N/a	164837
Prenatal 57 Cluster 1	['X']	chr-dup	(X)x2,(Y)x1	47,XXY	N/a	N/a	(X)x2,(Y)x1	TRUE	N/a	N/a	TRUE	0	N/a	XXY
Parental 19 Cluster 2	['3']	dup	dup(3)(4028607;4534902)	missed	chr3:4028607-4534902 Dup	N/a	dup(3)(4,171,107-4,536,541)	FALSE	TRUE	N/a	TRUE	0	N/a	N/a	506295
Parental 19 Cluster 3	['15']	del	del(15)(43603435;43656148)	missed	chr15:43603435-43656148 Del	N/a	BED:del(15)(43572907-43725887)	FALSE	TRUE	N/a	TRUE	0	N/a	N/a	52713
Parental 23 Cluster 1	['4']	dup	dup(4)(150744138;151121503)	missed	chr4:150744138-151121503 Dup	N/a	dup(4)(150,746,213-151,144,337)	FALSE	TRUE	N/a	TRUE	0	N/a	N/a	377365
Parental 25 Cluster 1	['2']	del	del(2)(181614431;182100868)	missed	chr2:181614431-182100868 Del	N/a	del(2)(181,607,525-182,120,958)	FALSE	TRUE	N/a	TRUE	0	N/a	N/a	486437
Parental 31 Cluster 1	['15']	dup	dup(15)(43603447;43696620)	missed	chr15:43603447-43696620 Dup	N/a	dup(15)(43562457-43662008)	FALSE	TRUE	N/a	TRUE	0	N/a	N/a	93173
Prenatal 548 Cluster 1	['X']	chr-del	(X)x1	N/a	(X)x1	N/a	(X)x1	N/a	TRUE	N/a	TRUE	0	N/a	Turner Syndrom
Parental 39 Cluster 1	['1', '17']	dup	dup(17)(318041;414472)	missed	chr17:318041-414472 Dup	N/a	BED:dup(391704;634138)	FALSE	TRUE	N/a	TRUE	0	N/a	N/a	96431
Parental 39 Cluster 2	['15']	dup	dup(15)(53595967;54159284)	missed	chr15:53595967-54159284 Dup	N/a	dup(15)(53,593,425-54,158,746)	FALSE	TRUE	N/a	TRUE	0	N/a	N/a	563317
Prenatal 518 Cluster 1	['21']	chr-dup	(21)x3	N/a	21q1 1.2q22.3(15006457_48097372)x3	N/a	(21)x3	N/a	TRUE	N/a	TRUE	0	N/a	Down Syndrom
Prenatal 515 Cluster 1	['13']	chr-dup	(13)x3	48, XY, +13, +mar	nuc ish 13q`4(RB-1x3)	N/a	(13)x3	TRUE	TRUE	N/a	TRUE	0	N/a	Patau Syndrom
Prenatal 244 Cluster 1	['13']	chr-dup	(13)x3	47, XY,+13	N/a	N/a	(13)x3	TRUE	N/a	N/a	TRUE	0	N/a	Patau Syndrom
Prenatal 232 Cluster 1	['21']	chr-dup	(21)x3	N/a	21q11.2q22.3(14613203_48100155)x3	N/a	(21)x3	N/a	TRUE	N/a	TRUE	0	N/a	Down Syndrom
Prenatal 230 Cluster 1	['X']	chr-del	(X)x1	45,X[13]/46,XY[2]	(X)x1,(Y)x0-1	N/a	(X)x1	TRUE	TRUE	N/a	TRUE	0	N/a	Turner Syndrom
Prenatal 221 Cluster 1	['21']	chr-dup	(21)x3	47, XY, +21	N/a	nuc ish(DXZ1x1,DYZ3x1,D18Z1x2), (RB-1x2,D21S259/D21S341/D21S342x2)	(21)x3	TRUE	N/a	TRUE	TRUE	0	N/a	Down Syndrom
Prenatal 219 Cluster 1	['21']	chr-dup	(21)x3	47, XY, +21	N/a	nuc ish(DXZ1x1,DYZ3x1,D18Z1x2), (RB-1x2,D21S259/D21S341/D21S342x2)	(21)x3	TRUE	N/a	TRUE	TRUE	0	N/a	Down Syndrom
Prenatal 184 Cluster 1	['21']	chr-dup	(21)x3	48,XY,+21,+mar	(21)x3	N/a	(21)x3	TRUE	TRUE	N/a	TRUE	0	N/a	Down Syndrom
Prenatal 139 Cluster 1	['13']	chr-dup	(13)x3	48,XY,+13,+mar	N/a	nuc ish 13q`4(RB-1x3)	(13)x3	TRUE	N/a	TRUE	TRUE	0	N/a	Patau Syndrom
Postnatal 512 Cluster 2	['9']	del	9p21.1(28190070_28347526)x1	missed	9p21.1(28,190,068_28,347,524)x1	N/a	del(9)(28,188,952-28,367,946)	FALSE	TRUE	N/a	TRUE	0	N/a		157456
Prenatal 130 Cluster 1	['18']	chr-dup	(18)x3	(18)x3	N/a	missed	(18)x3	TRUE	N/a	FALSE	TRUE	0	N/a	Edwards syndrome
Postnatal 544 Cluster 2	['9']	del	9p21.1(28190070_28347526)x1	missed	9p21.1(28,190,068_28,347,524)x1	N/a	del(9)(28,188,952-28,352,275)	FALSE	TRUE	N/a	TRUE	0	N/a		157456
Postnatal 798 Cluster 1	['9']	dup	9p24.1q21.12(6870001_69585084)x3	N/a	9q21.11(71543516_72089445)x3	N/a	dup(9)(68,929,308-69,515,508)	N/a	TRUE	N/a	TRUE	0	N/a		62715083
Postnatal 798 Cluster 2	['13']	del	13q32.2(98647747_101047648)x1	N/a	13q32.3(100826355_100955204)x1	N/a	del(13)(100,162,893-100,304,824)	N/a	TRUE	N/a	TRUE	0	N/a		2399901
Postnatal 889 Cluster 1	['4']	inv	inv(4)(q34.1q35.2)(175378850_190123121)	46,XX,inv(4)(q34.2q35.2)	missed	missed	missed	TRUE	FALSE	FALSE	FALSE	2	unknown		14744271
Postnatal 919 Cluster 1	['X']	chr-dup	(X)x3	(X)x3	Xp22.33q28(168,546_155,233,731)x3	N/a	(X)x3	TRUE	TRUE	N/a	TRUE	0	N/a	Triple X
Postnatal 919 Cluster 2	['9']	del	9p21.1(28190070_28347526)x1	missed	9p21.1(28,190,068_28,347,524)x1	N/a	del(9)(28,188,952-28,352,275)	FALSE	TRUE	N/a	TRUE	0	N/a		157456
Postnatal 1251 Cluster 1	['9', '22']	t	t(9;22)(p22.2;q11.21)(16930223;21332491)	46,XY,t(9;22)(p22;q11.2)	missed	.ish t(9;22)(ARSA+,TUPLE1-;TUPLE1+,ARSA-)	t(9;22)(21,979,929;20,364,965)	TRUE	FALSE	TRUE	TRUE	0	N/a
Postnatal 544 Cluster 1	['X']	chr-dup	(X)x3	(X)x3	Xp22.33q28(168,546_155,233,731)x3	N/a	(X)x3	TRUE	TRUE	N/a	TRUE	0	N/a	Triple X
Postnatal 1294 Cluster 1	['5', '9']	t	t(5;9)(p14.1;p21.3)(25380415;20658199)	46,XX,t(5;9)(p14.1;p21.3)	N/a	N/a	t(5;9)(25,389,590;20,654,228)	TRUE	N/a	N/a	TRUE	0	N/a
Postnatal 1301 Cluster 1	['3', '5']	t	t(3;5)(p23;p15.1)(31458509;16699892)	46,XX,t(3;5)(p23;p15.1)	N/a	N/a	t(3;5)(27,883,614;14,141,579)	TRUE	N/a	N/a	TRUE	0	N/a
Postnatal 1397 Cluster 1	['X']	del	Xp22.33p11.1(251879_58500731)x1	N/a	Xp22.33p11.1(168,546_58,527,164)x1	N/a	del(X)(11,555-62,521,448)	N/a	TRUE	N/a	TRUE	0	N/a		58248852
Postnatal 512 Cluster 1	['X']	chr-dup	(X)x3	(X)x3	Xp22.33q28(168,546_155,233,731)x3	N/a	(X)x3	TRUE	TRUE	N/a	TRUE	0	N/a	Triple X
Postnatal 1404 Cluster 1	['9', '22']	t	t(9;22)(p22.2;q11.21)(16930223;21332491)	46,XY,t(9;22)(p22;q11.2)	missed	.ish t(9;22)(ARSA+,TUPLE1-;TUPLE1+,ARSA-)	t(9;22)(21,979,929;20,341,510)	TRUE	FALSE	TRUE	TRUE	0	N/a
Postnatal 2436 Cluster 1	['X']	chr-dup	(X)x3	(X)x3	Xp22.33q28(168,546_155,233,731)x3	N/a	(X)x3	TRUE	TRUE	N/a	TRUE	0	N/a	Triple X
Postnatal 1544 Cluster 1	['3', '17']	t	t(3;17)(q21.2;q21.32)(125831156;47435312)	46,XY,t(3;17)(q21;q21.3)	missed	missed	t(3;17)(124,536,886;40,762,502)	TRUE	FALSE	FALSE	TRUE	0	N/a
Postnatal 1562 Cluster 1	['4', '16']	t-nr	der(4)ins(4;16)(p14;q12.2q21)(46025649;52768142-60018269)	46,XX,der(4)ins(4;16)(p14;q12.2q21)	4p12.1(45,789,972-46,990,549)x1 dn, 16q12.2q13(51,228,197-55,062,225)x3 mat,16q13q21(55,347,475-58,606,937)x3 mat	N/a	ins-t(4;16)(46,025,649;52,768,142-60,018,269)	TRUE	FALSE	N/a	TRUE	0	N/a		7250127
Postnatal 1562 Cluster 1	['4', '16']	del	4p12(45787955_46988532)x1	missed	4p12.1(45,789,972-46,990,549)x1	N/a	del(4)(46,025,650-47,298,362)	FALSE	TRUE	N/a	TRUE	0	N/a		1200577
Postnatal 1562 Cluster 1	['4', '16']	dup	16q12.1q12.2(51194286_55028313)x3	missed	16q12.2q13(51,228,197-55,062,225)x3	N/a	ins(4;6)(12,986;52,768,142-56,464,874)	FALSE	TRUE	N/a	TRUE	0	N/a		3834027
Postnatal 1562 Cluster 1	['4', '16']	dup	16q12.2q21(55313563_58573033)x3	missed	16q13q21(55,347,475-58,606,937)x3	N/a	ins(4;6)(56,775,514;56,775,514-60,018,269)	FALSE	TRUE	N/a	TRUE	0	N/a		3259470
Postnatal 1670 Cluster 1	['3', '5']	t	t(3;5)(p24.1;p15.31)(28608509;7899889)	46, XY, t(3;5)(p24.1;p15.2)	missed	N/a	t(3;5)(27,883,614;14,142,127)	TRUE	FALSE	N/a	TRUE	0	N/a
Postnatal 2285 Cluster 1	['21']	chr-dup	(21)x3	47,XY,+21[24]	.arr(21)x3	N/a	(21)x3	TRUE	TRUE	N/a	TRUE	0	N/a	Down Syndrom
Postnatal 1878 Cluster 2	['9']	del	9p21.1(28190070_28347526)x1	missed	9p21.1(28,190,068_28,347,524)x1	N/a	BED:del(9)(28188952-28352275)	FALSE	TRUE	N/a	TRUE	0	N/a		157456
Postnatal 2003 Cluster 1	['1', '21']	t	t(1;21)(p36.22;q22.3)(10889961;43964029)	46,XY,t(1;21)(p36.2;q22.3)	N/a	N/a	t(1;21)(9,152,133;45,556,671)	TRUE	N/a	N/a	TRUE	0	N/a
Postnatal 2282 Cluster 1	['12', '16']	t-ins	t(12;16)(p12.1;p13.13)(24,384,542;12,465,354), fus(16;16)(p13.11;p11.2)(15,742,401_31,631,749)	46,XY,der(12)ins(12;16)(p11.21;p13.13p11.2)	N/a	N/a	t(12;16)(24,384,542;15,756,601)	TRUE	N/a	N/a	FALSE	1	Reconstructed a reciprocal balanced translocation, instead of a balanced insertion.	translocation interrupts SOX5: 12P12.5 Intragenic deletions associated with ID	15889348
Postnatal 2281 Cluster 1	['2', '3']	t	t(2;3)(q23.3;p13)(150992960;71950850)	46,XY,t(2;3)(q23;p13)(de novo)	missed	ish t(2;3)(qtel;ptel)(D2S447-,D3S4559+;D2S447+,D3S4559	t(2;3)(148,288,327;76,948,547)	TRUE	FALSE	TRUE	TRUE	0	N/a	transposition interrupts MBD5: EHMT1-like ID
Postnatal 2081 Cluster 1	['1', '6']	t	t(1;6)(p22.1;p22.2)(92884444;26115997)	46, XX, t(1;6)(p22.1;p22.2)	N/a	N/a	t(1;6)(94,349,505;27,554,072)	TRUE	N/a	N/a	TRUE	0	N/a
Postnatal 2083 Cluster 1	['X', '7']	t	t(X;7)(q24;q22.3)(119566093;106309555)	46,X,t(X;7)(q24;q22.3)	N/a	N/a	t(X;7)(115890612;101937721)	TRUE	N/a	N/a	TRUE	0	N/a
Postnatal 2085 Cluster 1	['13', '22']	t	t(13;22)(q21.3;q13.2)(63425868;42204059)	46, XY, t(13;22)(q21.3;q13.2)	N/a	N/a	t(13;22)(67,569,810;41,167,372)	TRUE	N/a	N/a	TRUE	0	N/a
Postnatal 2147 Cluster 1	['2732626_2827765']	dup	3p26.3p26.2(2732626_2827765)x3	N/a	3p26.3p26.2(2774310_2869449)x3	N/a	BED:dup(3)(2760633;2812741)	N/a	TRUE	N/a	TRUE	0	N/a		95139
Postnatal 2157 Cluster 1	['2', '11']	t	t(2;11)(p21;q23.3)(44572861;115929284)	46, XY t(2;11)(p21;q23)	N/a	N/a	t(2;11)(44,186,153;120,518,309)	TRUE	N/a	N/a	TRUE	0	N/a
Postnatal 2276 Cluster 1	['12', '17']	t	t(12;17)(q13.13;q23.2)(51856218;62063261)	t(12;17)(q13.13;q23.2)	N/a	N/a	t(12;17)(59,511,858;62,979,134)	TRUE	N/a	N/a	TRUE	0	N/a	translocation interrupts TANC2: TANC2-related neurodevelopmental and psychiatric disorders
Postnatal 2209 Cluster 2	['9']	del	9p21.1(28190070_28347526)x1	missed	9p21.1(28,190,068_28,347,524)x1	N/a	del(9)(28,188,952-28,352,275)	FALSE	TRUE	N/a	TRUE	0	N/a		157456
Postnatal 2238 Cluster 1	['X', '3']	t	t(X;3)(q26.2;p21.31)(134241931;49012241)	46,XX,t(X;3)(q26;p21)	missed	N/a	t(X;3)(132,541,804;55,126,402)	TRUE	FALSE	N/a	TRUE	0	N/a
Postnatal 2243 Cluster 1	['12', '16']	t-ins	t(12;16)(p11.21;p13.13)(31847067;11456144), t(16;16)(p13.13;p11.2)(11456144;31727155)	46,XX,ins(12;16)(p11.21;p13.13p11.2)	N/a	N/a	Dicentric reconstruction of t(12;16)	TRUE	N/a	N/a	FALSE	2	Wrong reconstructed structure: dicentric		20271011
Postnatal 2245 Cluster 1	['3', '9']	t	t(3;9)(q12.2;p11.2)(100831157;41100001)	46,XX,t(3;9)(q12;p11.2)	N/a	missed	t(3;9)(104,373,354;37,254,876)	TRUE	N/a	FALSE	TRUE	0	N/a
Postnatal 2249 Cluster 1	['4', '14']	t	t(4;14)(p15.32;q32.12)(16498377;92583660)	46,XY,t(4;14)(p15.32;q32.1)	missed	.ish t(4;14)(p15.32;q32.1)(D4S96-;D4S96+)	t(4;14)(13,144,191;91,401,624)	TRUE	FALSE	TRUE	TRUE	0	N/a
Postnatal 2254 Cluster 1	['X', '1']	t	t(X;1)(q21.31;p34.3)(87912289;36884364)	46,X,t(X:1)(q21.2;p34.3)	N/a	N/a	t(X;1)(q21.31;p36.33)(88,759,516;34,203,802)	TRUE	N/a	N/a	TRUE	0	N/a
Postnatal 2209 Cluster 1	['X']	chr-dup	(X)x3	(X)x3	Xp22.33q28(168,546_155,233,731)x3	N/a	(X)x3	TRUE	TRUE	N/a	TRUE	0	N/a	Triple X
Postnatal 2280 Cluster 1	['4', '16']	t	t(4;16)(q21.3;q24.2)(86528848;87197370)	46,XX,t(4;16)(q21.3;q24)	N/a	N/a	t(4;16)(73,711,118;77,870,435)	TRUE	N/a	N/a	TRUE	0	N/a
Postnatal 2079 Cluster 1	['X']	chr-del	(X)x1	N/a	45,X.arr(X)x1	N/a	(X)x1	N/a	TRUE	N/a	TRUE	0	N/a	Turner Syndrom
Postnatal 2073 Cluster 1	['Y']	chr-dup	(Y)x2	N/a	Yp11.32q11.23(201,704_59,343,488)x2	N/a	(Y)x2	N/a	TRUE	N/a	TRUE	0	N/a	XYY
Postnatal 2283 Cluster 1	['8', '11']	t	t(8;11)(q22.1;q14.2)(95137773;87227895)	46,XY,t(8;11)(q22.1;q14.2)	missed	N/a	t(8;11)(91,323,425;84,293,109)	TRUE	FALSE	N/a	TRUE	0	N/a
Postnatal 2284 Cluster 1	['6', '11']	t	t(6;11)(q22.2;q22.1)(118078838;99779135)	46,XY,t(6;11)(q22.2;q22.1)	N/a	N/a	t(6;11)(122,251,721;109,872,161)	TRUE	N/a	N/a	TRUE	0	N/a
Postnatal 1878 Cluster 1	['X']	chr-dup	(X)x3	(X)x3	Xp22.33q28(168,546_155,233,731)x3	N/a	(X)x3	TRUE	TRUE	N/a	TRUE	0	N/a	Triple X
Postnatal 2327 Cluster 1	['4']	del	4p12(46093196_47302069)x1	missed	4p12(46,095,213_47,304,086)x1	missed	del(4)(46,087,904-47,298,362)	FALSE	TRUE	FALSE	TRUE	0	N/a		1208873
Postnatal 2327 Cluster 2	['16']	dup	16q12.2q13(52630911_56467868)x3	missed	16q12.2(52,664,823_56,501,780)x3	missed	missed	FALSE	TRUE	FALSE	FALSE	1	unknown		3836957
Postnatal 2327 Cluster 2	['16']	dup	16q13q21(56731773_60032937)x3	missed	16q13q21(56,765,685_60,066,841)x3, 16q21(60,511,481_60,686,987)x3	missed	missed	FALSE	TRUE	FALSE	FALSE	1	unknown		3301164
Postnatal 2335 Cluster 1	['5', '10']	t	t(5;10)(q15;p13)(95914295;14708002)	46,XX,t(5;10)(q15;p13)	N/a	N/a	t(5;10)(89,261,080;14,616,850)	TRUE	N/a	N/a	TRUE	0	N/a
Postnatal 1528 Cluster 1	['21']	chr-dup	(21)x3	47,XY,+21	N/a	N/a	(21)x3	TRUE	N/a	N/a	TRUE	0	N/a	Down Syndrom
Postnatal 2436 Cluster 2	['9']	del	9p21.1(28190070_28347526)x1	missed	9p21.1(28,190,068_28,347,524)x1	N/a	del(9)(28,171,542-28,364,123)	FALSE	TRUE	N/a	TRUE	0	N/a		157456
Postnatal 2449 Cluster 1	['3']	dup	3p26.3p26.2(2732626_2827765)x3	N/a	3p26.3p26.2(2774310_2869449)x3	N/a	BED:dup(3)(2760633-2812741)	N/a	TRUE	N/a	TRUE	0	N/a		95139
Prenatal 13 Cluster 1	['2']	dup	2q12.3q13(107,897,251_109,746,741)x3	N/a	2q12.3q13(108,513,707-110,504,318)x3	N/a	dupinv(2)(107,892,033-110,514,327)	N/a	TRUE	N/a	TRUE	0	N/a		1849490
Prenatal 54 Cluster 1	['11', '15']	t	t(11;15)(q23.3;q22.3)	46, XY, t(11;15)(q23.3;q22.3)	N/a	N/a	t(11;15)(133,724,731;84,362,404)	TRUE	N/a	N/a	TRUE	0	N/a
Postnatal 1397 Cluster 1	['X']	chr-dup	(X)x3	N/a	Xq11.1q28(61,882,086_155,233,731)x3	N/a	(X)x3	N/a	TRUE	N/a	TRUE	0	N/a	Triple X
Postnatal 1293 Cluster 1	['Y']	chr-dup	(Y)x2	N/a	(Y)x2	N/a	(Y)x2	N/a	TRUE	N/a	TRUE	0	N/a	XYY
Parental 45 Cluster 1	['1', '15']	t	t(1;15)(q41;q25.1)(220319127;78016193)	46,XY,t(1;15)(q?42;q?24)	N/a	N/a	t(1;15)(220,322,626;78,010,675)	TRUE	N/a	N/a	TRUE	0	N/a	Inheritance Issue from Balanced Translocation
Parental 39 Cluster 1	['1', '17']	t	t(1;17)(q43;q25.3)(237663872;80551930)	46,XY,t(1;17)(q42;q25)	missed	N/a	t(1;17)(237,668,708;80,544,491)	TRUE	FALSE	N/a	TRUE	0	N/a	Inheritance Issue from Balanced Translocation
Prenatal 139 Cluster 2	['15']	idic	idic(15)(q11.2)	48,XY,+13,+mar	N/a	ish idic(15)(q11.2)(D15Z1++)	missed	TRUE	N/a	TRUE	FALSE	2	OGM unable to detect CNV in centromere
Prenatal 145 Cluster 1	['10']	dup	10p11.21(34,881,631_35,021,378)x3	N/a	10p11.21(35,170,559-35,310,306)x3	missed	BED:dup(10)(34883020-35028718)	N/a	TRUE	FALSE	TRUE	0	N/a		139747
Prenatal 147 Cluster 1	['11']	del	11p11.2(48,359,936-48,908,580)x1	N/a	11p11.2p11.12(48,381,488-48,930,132)x1	nuc ish(DXZ1x1, DYZ3x1 ,D18Z1x2),(RB-1,D21S259/D21S341/D21S342)x2	del(11)(48,350,254-48,949,944)	N/a	TRUE	TRUE	TRUE	0	N/a		548644
Prenatal 151 Cluster 1	['3']	dup	3p26.3(1,739,729_2,162,780)x3	N/a	3p26.3(1,781,413-2,204,464)x3	N/a	BED:dup(3)(1740106-2167145)	N/a	TRUE	N/a	TRUE	0	N/a		423051
Prenatal 151 Cluster 2	['6']	dup	6q23.3(135,521,587_135,733,899)x3	N/a	6q23.3(135,842,725-136,055,037)x3	N/a	dup(6)(135,523,738-135,732,224)	N/a	TRUE	N/a	TRUE	0	N/a		212312
Parental 2006 Cluster 1	['9', '11']	t	t(9;11)(q22.31;p12)(93837719;39928451)	46,XX,t(9;11)(q22.3;p12)	N/a	N/a	t(9;11)(102,186,400;35,880,365)	TRUE	N/a	N/a	TRUE	0	N/a	Inheritance Issue from Balanced Translocation
Prenatal 184 Cluster 1	['21']	dup	21p11.2(8,524,606_10,429,984)x7	missed	21p11.2q22.3(10827533_48100155)x3	N/a	missed	FALSE	TRUE	N/a	FALSE	1	cn masked		1905378
Prenatal 186 Cluster 1	['X']	del	Xq27.1q28(141,196,675_156,007,082)x1	N/a	Xq27.1q28(140290850_155236747)x1	N/a	del(X)(141,187,853-156,040,895)	N/a	TRUE	N/a	TRUE	0	N/a		14810407
Prenatal 205 Cluster 1	['2', '14']	t-ub-ins	ins(14;2)(q32;q31.2q36.1)(89,300,001-107,043,718;177,100,001_224,300,000)	46,XY,der(14)?ins(14;2)(q32;q31.q36.1)	missed, arr[GRCh37] 2q31.2q36.1(178869262x2,178906614_222109777x3, 222150305x2)	.ish der(14)ins(14;2)(qter;q36.1q31.2)	ins-t(14;2)(106,873,282;221,204,993-178,043,170)	TRUE	FALSE	TRUE	TRUE	0	N/a		43161823
Parental 1999 Cluster 1	['4', '7']	t	t(4;7)(p16.2;p22.1)(5248274;5810370)	N/a	N/a	.ish t(4;7) (p16.2;p22.1)	t(4;7)(3,891,469;6,883,615)	N/a	N/a	TRUE	TRUE	0	N/a	Parental Balanced Translocation leads to Wolf-Hirschhorn unbalanced translocation in Child
Parental 19 Cluster 1	['X']	del	del(X)(31614556;31831572)	missed	chrX:31614556-31831572 Del	N/a	del(X)(31,600,754-31,834,804)	FALSE	TRUE	N/a	TRUE	0	N/a	monoallelic loss of DMD, leads to Becker muscular dystrophy	217016
Prenatal 226 Cluster 1	['22']	del	22q11.21(18,874,235-20,926,659)x1	N/a	22q11.21(18861748_21280947)x1	N/a	del(22)(18,181,892-20,941,217)	N/a	TRUE	N/a	TRUE	0	N/a		2052424
Prenatal 228 Cluster 1	['X']	del	Xp22.31(6,538,899-8,167,012)x1	N/a	Xp22.31(6456940_8135053)x1	N/a	del(X)(6,529,266-8,176,402)	N/a	TRUE	N/a	TRUE	0	N/a		1628113
Parental 1714 Cluster 1	['6', '10']	t	t(6;10)(q24.3;q23.33)(146978865;93064981)	46,XX,t(6;10)(q24.3;q23.3)	N/a	N/a	t(6;10)(145,797,040;93,062,292)	TRUE	N/a	N/a	TRUE	0	N/a	Inheritance Issue from Balanced Translocation
Parental 1392 Cluster 1	['13', '16']	t	t(13;16)(q32.2;q21)(98097747;62016093)	46,XX,t(13;16)(q32.2;q21)	N/a	N/a	t(13;16)(97,630,397;65,369,032)	TRUE	N/a	N/a	TRUE	0	N/a	Inheritance Issue from Balanced Translocation
Prenatal 234 Cluster 1	['9']	dup	9p24.3p21.3(46,587-22,028,802)x3	N/a	9p24.3p21.3(46587_22028801)x3	N/a	ins(18;9)(61,917,380;22,009,703-14,566)	N/a	TRUE	N/a	TRUE	0	N/a		21982215
Prenatal 234 Cluster 2	['18']	del	18q21.33q23(61,918,726-80,257,297)x1	N/a	18q21.33q23(59585959_78015180)x1	N/a	del(18)(61,917,381-80,256,374)	N/a	TRUE	N/a	TRUE	0	N/a		18338571
Parental 1359 Cluster 1	['10', '12']	t	t(10;12)(q25.2;p13.31)(111640242;7619118)	46,XY,t(10;12)(q25.2;p13.31)	N/a	N/a	t(10;12)(112,780,961;6,241,320)	TRUE	N/a	N/a	TRUE	0	N/a	Inheritance Issue from Balanced Translocation
Prenatal 282 Cluster 1	['1']	del	1p36.33p36.22(82,154_10,200,534)x1	N/a	1p36.33p36.22(82154_10260592)x1	N/a	del(1)(0-10,180,177)	N/a	TRUE	N/a	TRUE	0	N/a		10118380
Prenatal 463 Cluster 1	['22']	del	22q11.21(20,714,785-21,109,441)x1	N/a	22q11.21(21069073_21463730)x1	N/a	del(22)(20,681,037-21,273,366)	N/a	TRUE	N/a	TRUE	0	N/a		394656
Prenatal 492 Cluster 1	['18']	del	18q21.32(59,985,549-60,245,552)x1	N/a	18q21.32(57,652,781-57,912,785)x1	N/a	del(18)(59,977,435-60,256,123)	N/a	TRUE	N/a	TRUE	0	N/a		260003
Prenatal 493 Cluster 1	['7']	del	7q33q34(137,290,551_140,633,891)x1	N/a	7q33q34(136,975,298-140,333,691)x1	N/a	del(7)(137,281,723-140,637,905)	N/a	TRUE	N/a	TRUE	0	N/a		3343340
Prenatal 494 Cluster 1	['17']	del	17p12p11.2(15,759,893-16,664,310)x1	N/a	17p12p11.2(15,663,207-16,567,624)x1	N/a	del(17)(15,752,128-16,669,511)	N/a	TRUE	N/a	TRUE	0	N/a		904417
Prenatal 494 Cluster 2	['22']	del	22q11.2(14,393,593-14,849,426)x1	N/a	21q11.2(15,765,914-16,221,747)x1	N/a	BED:del(22)(14393578-14851748)	N/a	TRUE	N/a	TRUE	0	N/a		455833
Prenatal 505 Cluster 1	['3']	dup	4p16.3p15.31(12985_18938569)x1	XX,del(4)(p15.3)	N/a	N/a	del(4)(12,985-18,938,569)	TRUE	N/a	N/a	TRUE	0	N/a		18925584
Prenatal 511 Cluster 1	['3']	dup	3p14.3p14.2(58,498,793_60,226,867)x3	N/a	3p14.3p14.2(58,484,520-60,212,595)x3	N/a	dup(3)(58,502,385-60,223,301)	N/a	TRUE	N/a	TRUE	0	N/a		1728074
Prenatal 512 Cluster 1	['5']	dup	5p15.2(10,701,758_10,965,471)x3	N/a	5p15.2(10,701,870-10,965,583)x3	N/a	dup(5)(10,858,053-10,949,073)	N/a	TRUE	N/a	TRUE	0	N/a		263713
Prenatal 512 Cluster 2	['7']	dup	7q22.3(107,665,131_107,789,710)x3	N/a	7q22.3q31.1(107,305,576-107,430,155)x3	N/a	BED:dup(7)(107670008-107785512)	N/a	TRUE	N/a	TRUE	0	N/a		124579
Prenatal 514 Cluster 1	['16']	dup	16p11.2(29,569,779_30,165,919)x3	N/a	16p11.2(29,581,100-30,177,240)x3	N/a	dup(16)(29,463,027-30,260,876)	N/a	TRUE	N/a	TRUE	0	N/a		596140
Parental 1350 Cluster 1	['2', '10']	t	t(2;10)(p23.2;p13)(27826031;14708002)	46,XX,t(2;10)(p23;p13)	N/a	N/a	t(2;10)(35,800,814;19,090,472)	TRUE	N/a	N/a	TRUE	0	N/a	Inheritance Issue from Balanced Translocation
Prenatal 515 Cluster 2	['15']	dup	15q11.2(20,500,001_25,500,000)x4	missed	ish idic(15)(q11.2)(D15Z1++)	N/a	missed	FALSE	TRUE	N/a	FALSE	1	cn masked		4999999
Prenatal 516 Cluster 1	['8']	dup	8q11.21(47,742,136_48,026,626)x3	N/a	8q11.21(48,654,698-48,939,186)x3	N/a	dup(8)(47,743,108-48,018,685)	N/a	TRUE	N/a	TRUE	0	N/a		284490
Prenatal 517 Cluster 1	['2']	dup	2q12.3q13(107,897,251-109,746,741)x3	N/a	2q12.3q13(108,513,707-110,504,318)x3	N/a	dup(2)(107,862,715-109,857,175)	N/a	TRUE	N/a	TRUE	0	N/a		1849490
Parental 13 Cluster 1	['13', '14']	rob	45,XX,rob(13;14)(q10;q10)	45,XX,rob(13;14)(q10;q10)	missed	N/a	missed	TRUE	FALSE	N/a	FALSE	2	Rob cannot be reliably detected by OGM	OMKar missed
Prenatal 519 Cluster 1	['2']	del	2q13(111,919,264_112,057,135)x1	N/a	2q13(112,676,841-112,814,712)x1	N/a	del(2)(111,928,148-112,046,822)	N/a	TRUE	N/a	TRUE	0	N/a		137871
Prenatal 521 Cluster 1	['1']	del	1p36.33p36.31(914,086-5,300,780)x1	N/a	1p36.33p36.32(849,466-5,360,840)x1	N/a	missed	N/a	TRUE	N/a	FALSE	1	cn masked (terminal)		4386694
Prenatal 522 Cluster 1	['22']	del	22q11.21(20,515,487-21,444,618)x1	N/a	22q11.21 (20,869,774-21,798,907)x1	N/a	del(22)(20,480,064-21,271,784)	N/a	TRUE	N/a	TRUE	0	N/a		929131
Prenatal 523 Cluster 1	['16']	dup	16p11.2(31,396,618-32,022,240)x3	N/a	16p11.2(31,407,939-32,033,561)x3	N/a	dup(16)(31,392,674-32,077,416)	N/a	TRUE	N/a	TRUE	0	N/a		625622
Prenatal 524 Cluster 1	['6']	del	6q27(165,516,066_166,867,246)x1	N/a	6q7(165,929,554-167,280,734)x1	N/a	del(6)(165,513,751-166,866,359)	N/a	TRUE	N/a	TRUE	0	N/a		1351180
Prenatal 525 Cluster 1	['5']	del	5q23.1(117,690,377-118,722,370)x1	N/a	5q23.1(117,026,072-118,058,065)x1	N/a	del(5)(117,694,227-118,731,074)	N/a	TRUE	N/a	TRUE	0	N/a		1031993
Prenatal 527 Cluster 1	['11']	del	11p11.2p11.12(48,359,936-48,908,580)x1	N/a	11p11.2p11.12(48,381,488-48,930,132)x1	N/a	del(11)(48,350,254-48,949,944)	N/a	TRUE	N/a	TRUE	0	N/a		548644
Prenatal 529 Cluster 1	['X']	del	Xp22.31(6,540,898-8,167,603)x0	N/a	Xp22.31(6,458,939-8,135,644)x0	N/a	del(X)(6529265-8176402)	N/a	TRUE	N/a	TRUE	0	N/a		1626705
Prenatal 530 Cluster 1	['1']	del	1q21.1(145,601,946-146,047,980)x1	N/a	1q21.1(145,387,023-145,888,926)x1	N/a	del(1)(144,721,959-146,054,918)	N/a	TRUE	N/a	TRUE	0	N/a		446034
Prenatal 531 Cluster 1	['3']	dup	3p26.3(1,739,729-2,162,780)x3	N/a	3p26.3(1,781,413-2,204,464)x3	N/a	dup(3)(1,740,106-2,167,145)	N/a	TRUE	N/a	TRUE	0	N/a		423051
Prenatal 531 Cluster 2	['6']	dup	6q23.3(135,521,587-135,733,899)x3	N/a	6q23.3(135,842,725-136,055,037)x3	N/a	dup(6)(135,523,738-135,732,224)	N/a	TRUE	N/a	TRUE	0	N/a		212312
Prenatal 532 Cluster 1	['1']	del	1q21.1q21.2(145,430,996-148,459,811)x1	N/a	1q21.1q21.2(145,373,287-147,947,839)x1	N/a	del(1)(143,537,230-149,732,309)	N/a	TRUE	N/a	TRUE	0	N/a		3028815
Prenatal 532 Cluster 2	['4']	dup	4q32.2(161,002,701-162,322,092)x3	N/a	4q32.2(161,923,853-163,243,244)x3	N/a	dup(4)(160,745,412-162,307,449)	N/a	TRUE	N/a	TRUE	0	N/a		1319391
Parental 1298 Cluster 1	['2', '9']	t	t(2;9)(q35;q34.3)(217535279;136385568)	46,XX,t(2;9)(q35;q34.3)	N/a	N/a	t(2;9)(219,672,835;133,498,284)	TRUE	N/a	N/a	TRUE	0	N/a	Inheritance Issue from Balanced Translocation
Prenatal 548 Cluster 2	['7']	dup	7p21.3(8,733,041-8,854,680)x3	N/a	7p21.3(8,772,671-8,894,310)x3	N/a	BED:dup(7)(8742463-8854128)	N/a	TRUE	N/a	TRUE	0	N/a		121639
Prenatal 548 Cluster 2	['7']	del	7q33(133,846,926-134,038,281)x1	N/a	7q33(133,531,679-133,723,034)x1	N/a	del(7)(133,844,115-134,049,198)	N/a	TRUE	N/a	TRUE	0	N/a		191355
Prenatal 549 Cluster 1	['5']	del	5q14.2q15(82,740,823-95,206,857)x1	N/a	5q14.2q15(82,036,642-94,542,561)x1	N/a	del(5)(82,741,496-95,213,138)	N/a	TRUE	N/a	TRUE	0	N/a		12466034
Prenatal 550 Cluster 1	['10']	dup	10p11.21(34,881,631-35,021,378)x3	N/a	10p11.21(35,170,559-35,310,306)x3	N/a	BED:dup(10)(34883020-35028718)	N/a	TRUE	N/a	TRUE	0	N/a		139747
Prenatal 731 Cluster 1	['22']	del	22q11.21(20,515,487-21,444,618)x1	N/a	22q11.21 (20,869,774-21,798,907)x1	N/a	del(22)(20,480,064-21,264,694)	N/a	TRUE	N/a	TRUE	0	N/a		929131
Prenatal 739 Cluster 1	['22']	del	22q11.21(20,515,487-21,444,618)x1	N/a	22q11.21 (20,869,774-21,798,907)x1	N/a	BED:del(22)(20480064-21264694)	N/a	TRUE	N/a	TRUE	0	N/a		929131

## Sheet: S4
OMKar parameters and tuning guidelines. Summary of key parameters used in OMKar, including their default values, roles, and whether tuning is recommended for different datasets.
Parameter	Description	Default Value	Role	Tuned?	Change Recommended?
MinCNVSize	Minimum size threshold for CNVs to be included in karyotype reconstruction	200 Kbp	Filters low-confidence, small CNVs	No	Yes, for high-resolution data can be decreased till 50 kbp
BreakpointMergeWindow	Window size to merge adjacent SV breakpoints	50 Kbp	Simplifies SV representation	No	No
Ttrans	Confidence threshold for translocations	0.05	Filters low-confidence SVs	No	Yes, for datasets with confidence SVs
Tindel	Confidence threshold for indels	0	Filters low-confidence SVs	No	Yes
Tinv	Confidence threshold for inversions	0.7	Filters low-confidence SVs	No	Yes, for datasets with low SV support
λ	Penalty on odd-degree vertices in Eulerian graph	1	ILP objective function weight	Yes	No
βv	Penalty on slack variable usage in ILP	4×len(v)/(5*10^6)	ILP objective function weight	Yes	No
αe	Reward for using breakpoint edges	72 if inter chromos mal, 9 otherwise	ILP objective function weight	Yes	No
γ	Penalty for CN discrepancy in ILP objective	5	ILP objective function weight	Yes	No

## Sheet: S5
Block signature for each structural variation. Variations are listed in the order of finding. INS:~insertion, DEL:~deletion, CONC:~concordant.
Event Name	Block Signature	Indel Allowance
Balanced Translocations	DEL-block and uninverted/inverted INS-block (allows inversion when the two blocks are 20 kbp away or on different Chromosomes)	10 Kbp before additional indel events
Inversion	DEL-block adjacent to inverted INS-block	20 Kbp block in-between
Left/Right Duplication Inversion	INS-block to the left/right of uninverted CONC-block	50 Kbp block in-between
Tandem Duplication	INS-block adjacent to uninverted CONC-block	20 Kbp block in-between
Deletion	All remaining DEL-block	N/a
Duplicated Insertion	All remaining INS-block	N/a

## Sheet: S6
Simulated structural variations}. (Canonical Structural Variants), where the two WT chromosomes are [1+ 2+ 3+] and [4+ 5+ 6+].
Causal SV within Cluster	Chromosome Cluster
Deletion	1+ 3+
Inversion	1+ 2- 3+
Tandem Duplication	1+ 2+ 2+ 3+
Left Duplication Inversion	1+ 2- 2+ 3+
Right Duplication Inversion	1+ 2+ 2- 3+
Balanced 2-break Reciprocal Translocation	1+ 2+ 6+, 4+ 5+ 3+ OR 1+ 5+ 3+, 4+ 2+ 6+
Transposition	1+ 2+ 3+ 6+, 4+ 5+ OR 1+ 2+ 5+ 3+, 4+ 6+
Chromosomal Deletion	Loss of one homologous chromosome
Chromosomal Duplication	Gain of one homologous chromosome
